# Supplementary material for: Tailoring the capacitive performance of ZnCo2O4 by doping of Ni2+ and fabrication of asymmetric supercapacitor
Source: Royal Society of Chemistry journal article supplement (doi:10.1039/d1nj03986e), 2021-01-01
Supplement: d1nj03986e1.pdf [file d1nj03986e1.pdf]

## Supporting Information

### Tailoring the capacitive performance of $\text{ZnCo}_2\text{O}_4$ by doping of $\text{Ni}^{2+}$ and fabrication of asymmetric supercapacitor

**M. Sandhiya<sup>a,b</sup>, G. Kaviarasan<sup>a‡</sup>, S. Santhoshkumar<sup>a‡</sup> and M. Sathish<sup>a,b\*</sup>**

<sup>a</sup>Electrochemical Power Sources (ECPS) Division, CSIR-Central Electrochemical Research  
Institute, Karaikudi - 630003, Tamilnadu, India.

<sup>b</sup>Academy of Scientific and Innovative Research (AcSIR), Ghaziabad-201002, India.

E-mail: [marappan.sathish@gmail.com](mailto:marappan.sathish@gmail.com); [msathish@cecri.res.in](mailto:msathish@cecri.res.in)

*Corresponding author:*

[marappan.sathish@gmail.com](mailto:marappan.sathish@gmail.com); [msathish@cecri.res.in](mailto:msathish@cecri.res.in)

## Materials

Graphite flakes powder ( $\leq 20\mu\text{m}$ , 99%), Nickel nitrate hexahydrate ( $\text{Ni}(\text{NO}_3)_2 \cdot 6\text{H}_2\text{O}$ ), Cobalt nitrate tetra hydrate ( $\text{Co}(\text{NO}_3)_2 \cdot 4\text{H}_2\text{O}$ ), Zinc acetate dihydrate ( $\text{Zn}(\text{CH}_3\text{CO}_2)_2 \cdot 2\text{H}_2\text{O}$ ), Citric acid monohydrate and Graphite flakes powder ( $\leq 20\ \mu\text{m}$ , 99%) are purchased from Sigma-Aldrich, India. Sodium Nitrate ( $\text{NaNO}_3$ , 99 wt%), hydrazine hydrate ( $\text{H}_6\text{N}_2\text{O}$ , 99 wt%) potassium permanganate ( $\text{KMnO}_4$ , 99.5 wt%), hydrogen peroxide ( $\text{H}_2\text{O}_2$ , 30 wt%), 1-methyl 2-pyrrolidone (NMP) ( $\text{CH}_3\text{NC}_4\text{H}_6\text{O}$ ) are obtained using E-Merck, India. Sulfuric acid ( $\text{H}_2\text{SO}_4$ , 98 wt %) is acquired via Ranbaxy laboratories, Ltd. Poly (vinylidene fluoride) (PVDF) ( $-\text{CH}_2-\text{CF}_2-$ )<sub>n</sub> purchased from Alfa Aesar, India. All the chemicals and reagents are used as received without any further purification. Deionized (DI) water is obtained from MILLIPORE water system.

## Preparation of Graphene oxide (GO)

GO has been synthesized by graphite flakes using modified Hammer's method. In typical synthesis, 1 g of graphite flakes and 1 g of  $\text{Na}_2\text{NO}_3$  are mixed with 50 ml  $\text{H}_2\text{SO}_4$  in 1000 ml round bottom flask and stirred for  $\frac{1}{2}$  h. Afterwards, 6 g of  $\text{KMnO}_4$  is added pinch by pinch under constant stirring and the temperature is maintained below  $5\ ^\circ\text{C}$  using ice bath. 80 ml of DI water was slowly added with vigorous stirring. The solution is further diluted by the addition of 200 ml of water followed by 6 ml of  $\text{H}_2\text{O}_2$ . The resultant mixture was stirred for 1 h. Then the filtered solution is filtered and washed with hot DI water several time until the pH of the solution become  $\sim 6$ . The product was dried under vacuum at  $90\ ^\circ\text{C}$ . The powder is re-dispersed with the known amount of DI water to make a GO solution.

### **Preparation of reduced graphene oxide (rGO):**

20 ml of GO solution has been taken in beaker and stirred for 1 h. Subsequently, add few drops of hydrazine hydrate and kept at 80 C under stirring. The resultant product was washed several times with water followed by ethanol.

### **Material characterization:**

Phase identification and crystalline nature of the synthesized materials was analyzed using Powder X-ray diffraction (XRD) measurements with Rigaku smart lab X-ray diffractometer using *Cu K $\alpha$*  radiation ( $\lambda = 1.5418 \text{ \AA}$ ) as a X- ray source and the  $2\theta$  values ranges from 10 to 80 ° with the step degree of 6 °/min. Lab Ram Evolution Spectrometer (Horiba) recorded Raman spectrum with argon-ion continuous wave laser (532 nm) as the excitation source. The width of the slit used for recording the Raman spectrum is 400 nm with the integration time of 5 s. The power at sample while recording the Raman spectrum of all samples is 10 kW. Elemental composition and oxidation states of  $\text{Ni}_{0.75}\text{Zn}_{0.25}\text{Co}_2\text{O}_4$  sample were analyzed by X-ray photoelectron spectroscopy (XPS) with thermo scientific, MULTILAB 2000 using *Mg K $\alpha$*  (1253.6 eV) as a radiation source. Surface morphology of the material were analyzed by Field emission scanning electron microscopy (FE-SEM) with EDAX, Carl Zeiss SUPRA 55VP microscope.

### **Electrochemical characterization:**

Doping of Ni with  $\text{ZnCo}_2\text{O}_4$  and their influences on electrochemical properties were measured by various electrochemical techniques such as cyclic voltammetry (CV) and galvanostatic charge-discharge (CD) using BioLogic SP-300 Modular Research Grade Potentiostat/Galvanostat/FRA electrochemical workstation. The fabrication of working electrodes is by mixing the active material, super P carbon, and poly vinylidene fluoride (PVDF) with ratio of 75:20:5 and make slurry using N-methyl pyrrolidone as a solvent. The

slurry is coated on the nickel foam as a substrate and it was kept in an oven 6 h for drying and the resulted working electrode contains ~ 3 mg of active material. A typical three-electrode setup equipped with above working electrode, a slice of Pt as a counter electrode and Hg/HgO as a reference electrode dipped in 3.5 M KOH as an electrolyte was used for the electrochemical characterization. Asymmetric supercapacitor device has been fabricated using Ni-doped ZnCo<sub>2</sub>O<sub>4</sub> and rGO as a working electrodes in aqueous electrolyte.

The specific capacity values of all the electrode materials are evaluated from the CD profile using following equation.

$$C_g = \frac{I \times \Delta t}{m} \quad (1)$$

Where,  $C_g$  is the specific capacity of the electrode (C/g),  $I$  is the applied current for the charge-discharge cycles (A),  $\Delta t$  is the discharge time (s),  $m$  is the active mass of the working electrode (g) and  $\Delta V$  is the operating potential window of the working electrode vs. Hg/HgO. The total capacity ( $C_t$ ), coulombic efficiency ( $\eta$ ) energy density (E) and power density (P) could be calculated by the following equations.

$$C_t = \frac{I \times \Delta t}{M} \quad (2)$$

$$C_g = 2 \times C_t \quad (3)$$

$$\eta = \frac{\Delta t_{discharge}}{\Delta t_{charging}} \times 100\% \quad (4)$$

$$E = \frac{C_t V}{2} \times \frac{1000}{3600} \quad (5)$$

$$P = \frac{E}{\Delta t} \times 3600 \quad (6)$$

Where,  $C_t$  is the total capacity (C/g),  $M$  is the total active mass of both the electrodes,  $C_g$  is the specific capacity (C/g),  $\eta$  is the coulombic efficiency (%),  $E$  is the energy density

(Wh/kg),  $V$  is the operating voltage (V),  $P$  is the power density (W/kg) of the fabricated symmetric supercapacitor.

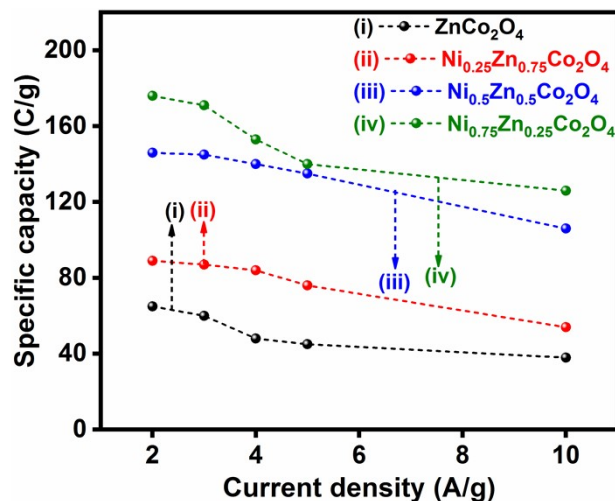

**Figure S1.** Plot of specific capacity (C/g) vs. current density (A/g) of (i) ZnCo<sub>2</sub>O<sub>4</sub>, (ii) Ni<sub>0.25</sub>Zn<sub>0.75</sub>Co<sub>2</sub>O<sub>4</sub>, (iii) Ni<sub>0.5</sub>Zn<sub>0.5</sub>Co<sub>2</sub>O<sub>4</sub>, and (iv) Ni<sub>0.75</sub>Zn<sub>0.25</sub>Co<sub>2</sub>O<sub>4</sub>.

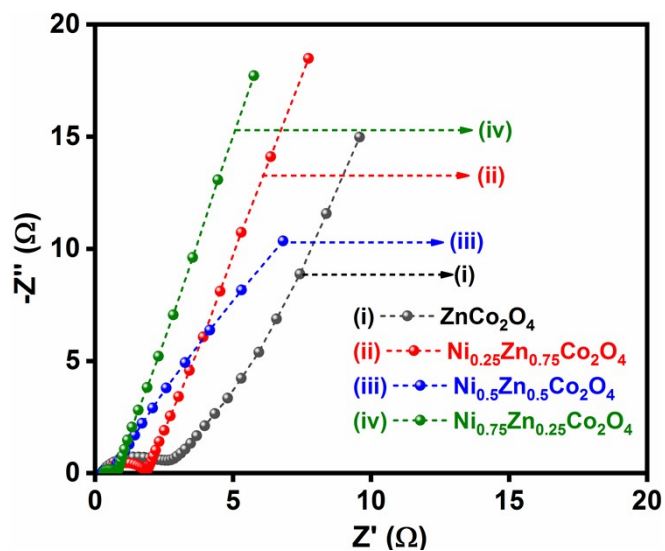

**Figure S2.** EIS of (i) ZnCo<sub>2</sub>O<sub>4</sub>, (ii) Ni<sub>0.25</sub>Zn<sub>0.75</sub>Co<sub>2</sub>O<sub>4</sub>, (iii) Ni<sub>0.5</sub>Zn<sub>0.5</sub>Co<sub>2</sub>O<sub>4</sub>, and (iv) Ni<sub>0.75</sub>Zn<sub>0.25</sub>Co<sub>2</sub>O<sub>4</sub>.

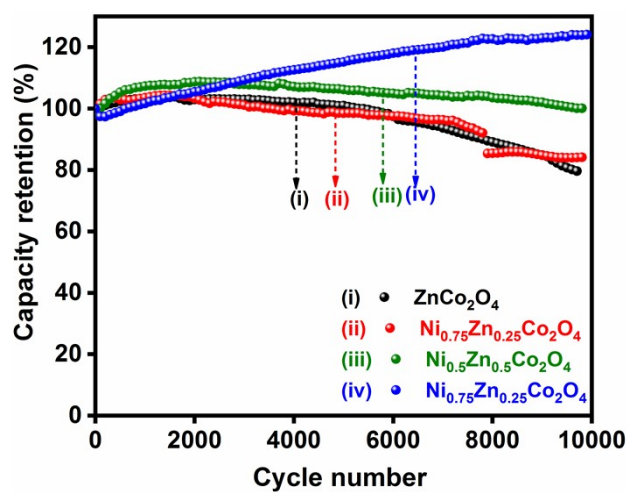

**Figure S3.** Long cycle plot of (a) ZnCo<sub>2</sub>O<sub>4</sub>, (ii) Ni<sub>0.25</sub>Zn<sub>0.75</sub>Co<sub>2</sub>O<sub>4</sub>, (iii) Ni<sub>0.5</sub>Zn<sub>0.5</sub>Co<sub>2</sub>O<sub>4</sub>, and (iv) Ni<sub>0.75</sub>Zn<sub>0.25</sub>Co<sub>2</sub>O<sub>4</sub>.

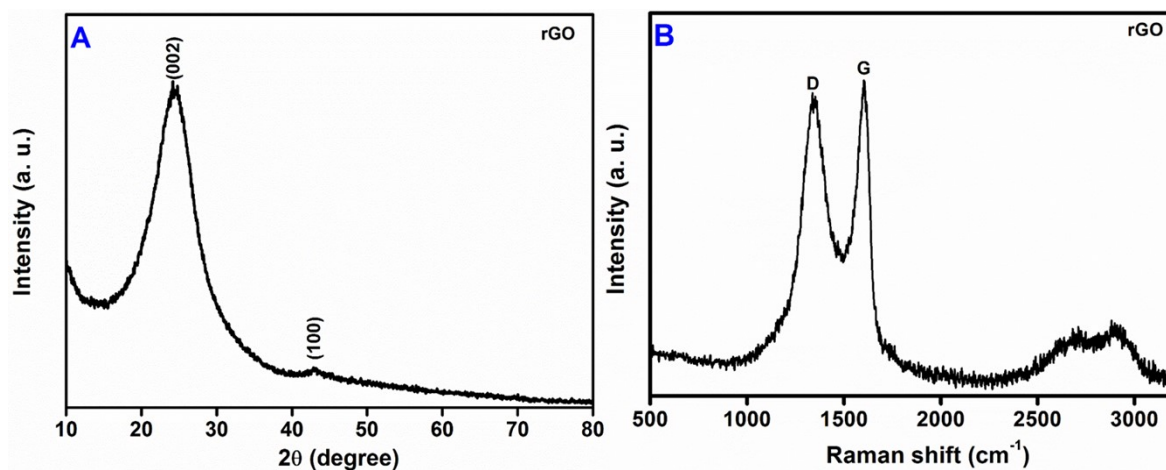

**Figure S4.** (A) XRD, and (B) Raman spectra of Rgo.

**Table S1.** Specific capacity of  $\text{ZnCo}_2\text{O}_4$ ,  $\text{Ni}_{0.25}\text{Zn}_{0.75}\text{Co}_2\text{O}_4$ ,  $\text{Ni}_{0.5}\text{Zn}_{0.5}\text{Co}_2\text{O}_4$ , and  $\text{Ni}_{0.75}\text{Zn}_{0.25}\text{Co}_2\text{O}_4$  at various current densities.

| Material                                                | specific capacity (C/g) at different current densities (A/g) |     |     |     |     |
|---------------------------------------------------------|--------------------------------------------------------------|-----|-----|-----|-----|
|                                                         | 2                                                            | 3   | 4   | 5   | 10  |
| $\text{ZnCo}_2\text{O}_4$                               | 65                                                           | 60  | 48  | 45  | 38  |
| $\text{Ni}_{0.25}\text{Zn}_{0.75}\text{Co}_2\text{O}_4$ | 89                                                           | 87  | 84  | 76  | 54  |
| $\text{Ni}_{0.5}\text{Zn}_{0.5}\text{Co}_2\text{O}_4$   | 146                                                          | 145 | 140 | 139 | 106 |
| $\text{Ni}_{0.75}\text{Zn}_{0.25}\text{Co}_2\text{O}_4$ | 176                                                          | 171 | 152 | 140 | 126 |
